# Supplementary material for: Bioconjugate functionalization of thermally carbonized porous silicon using a radical coupling reaction
Source: Royal Society of Chemistry journal article supplement (doi:10.1039/c0dt00936a), 2010-01-01
Supplement: c0dt00936a.pdf [file c0dt00936a.pdf]

DOI:10.1039/C0DT00936A

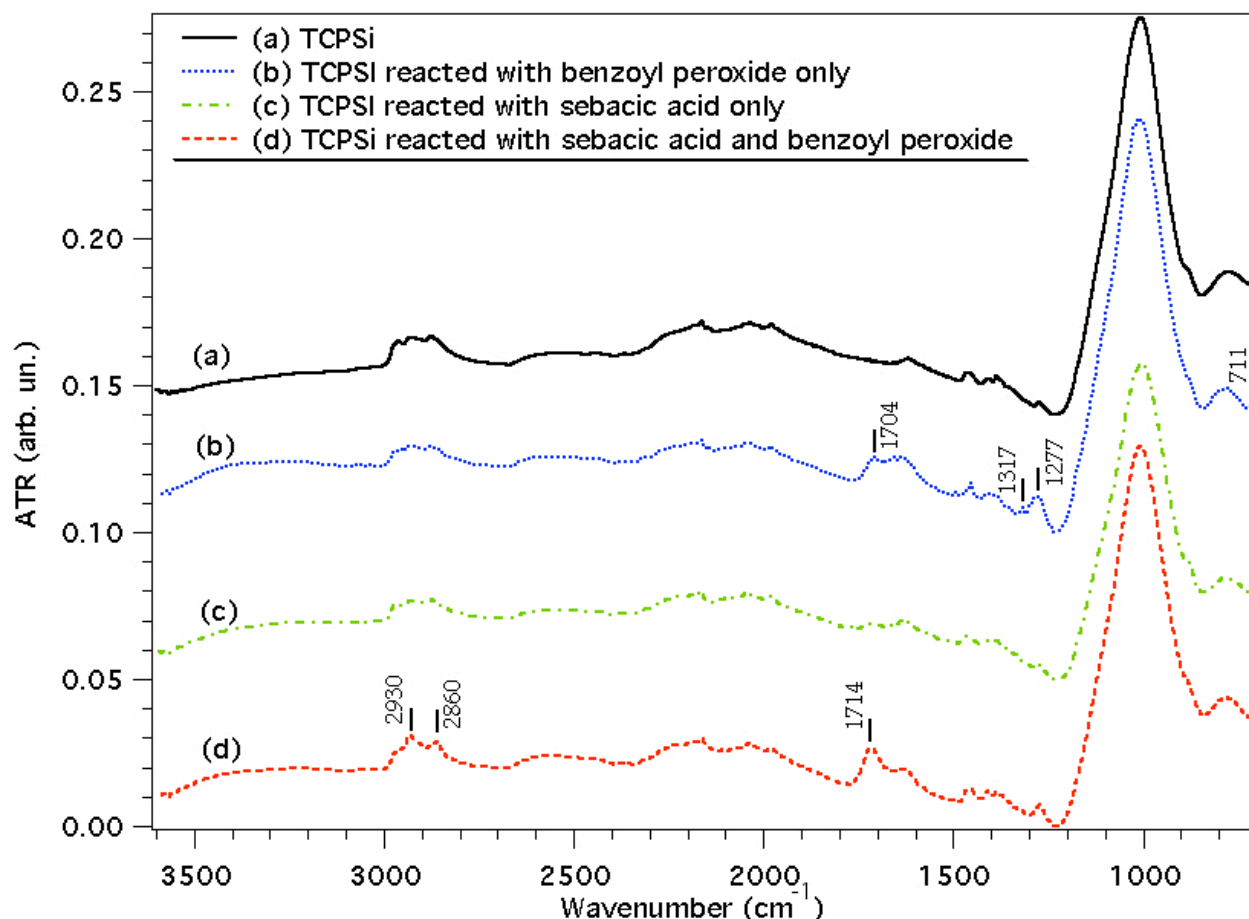

**Supplemental Figure S1.** Attenuated total reflectance (ATR) spectra of (a) thermally carbonized porous Si; (b) thermally carbonized porous Si chip treated with benzoyl peroxide; (c) thermally carbonized porous Si chip treated with sebacic acid only (no benzoyl peroxide); (d) thermally carbonized porous Si chip treated with sebacic acid and benzoyl peroxide.
